# Supplementary material for: Effect of TGF-β1 on eosinophils to induce cysteinyl leukotriene E4 production in aspirin-exacerbated respiratory disease
Source: PubMed Central journal article supplement (PMC8389430; doi:10.1371/journal.pone.0256237), 2021-08-26
Supplement: pone.0256237.s001.pdf [file pone.0256237.s001.pdf]

## Supplementary Figures

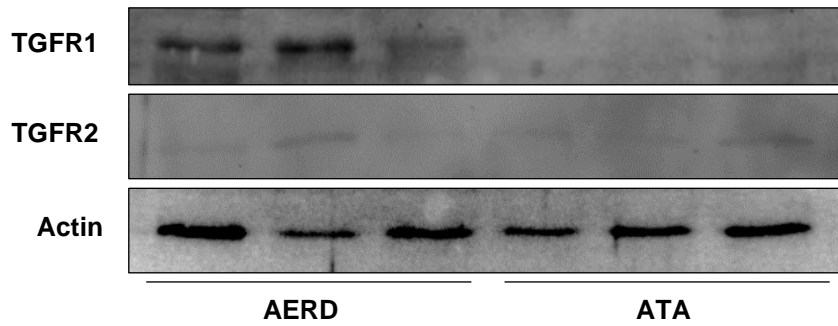

**S1 Fig. Expression of TGF- $\beta$ 1 and TGF- $\beta$ 2 receptors in human peripheral eosinophils.** (n = 3 asthmatic patients per group) TGFR1, TGF- $\beta$ 1 receptor; TGFR2, TGF- $\beta$ 2 receptor.
