# Supplementary material for: Effect of TGF-β1 on eosinophils to induce cysteinyl leukotriene E4 production in aspirin-exacerbated respiratory disease
Source: PubMed Central journal article supplement (PMC8389430; doi:10.1371/journal.pone.0256237), 2021-08-26
Supplement: pone.0256237.s002.pdf [file pone.0256237.s002.pdf]

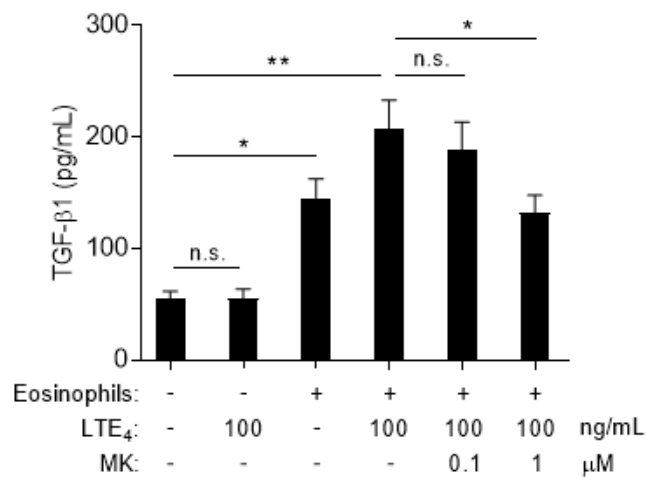

**S2 Fig. Effect of eosinophils on airway epithelial cells by secreting granule proteins.** Levels of TGF-β1 released from A549 cells when co-cultured with peripheral eosinophils with/without LTE<sub>4</sub> or montelukast (MK). The data are presented as means ± SD, n = 5. \**P* < .05 and \*\**P* < .01 were obtained by the Mann-Whitney test. n.s., not significant.
