# Supplementary material for: Effect of TGF-β1 on eosinophils to induce cysteinyl leukotriene E4 production in aspirin-exacerbated respiratory disease
Source: PubMed Central journal article supplement (PMC8389430; doi:10.1371/journal.pone.0256237), 2021-08-26
Supplement: pone.0256237.s003.pdf [file pone.0256237.s003.pdf]

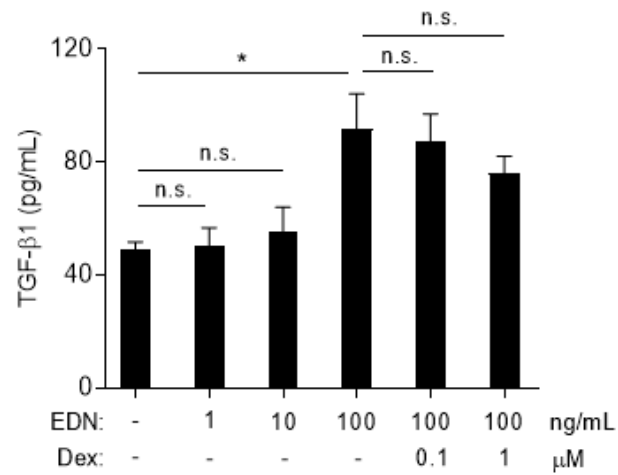

**S3 Fig. Function of dexamethasone (Dex) against eosinophil granule proteins to suppress TGF-β1 production from airway epithelial cells.** The data are presented as means ± SD, n = 5. \* $P < .05$  was obtained by the Mann-Whitney test. n.s., not significant. EDN, eosinophil-derived neurotoxin.
